# Supplementary material
Source: MDPI journal article supplement (https://www.mdpi.com/1424-8247/16/6/809)
Supplement: s1 [file s1]

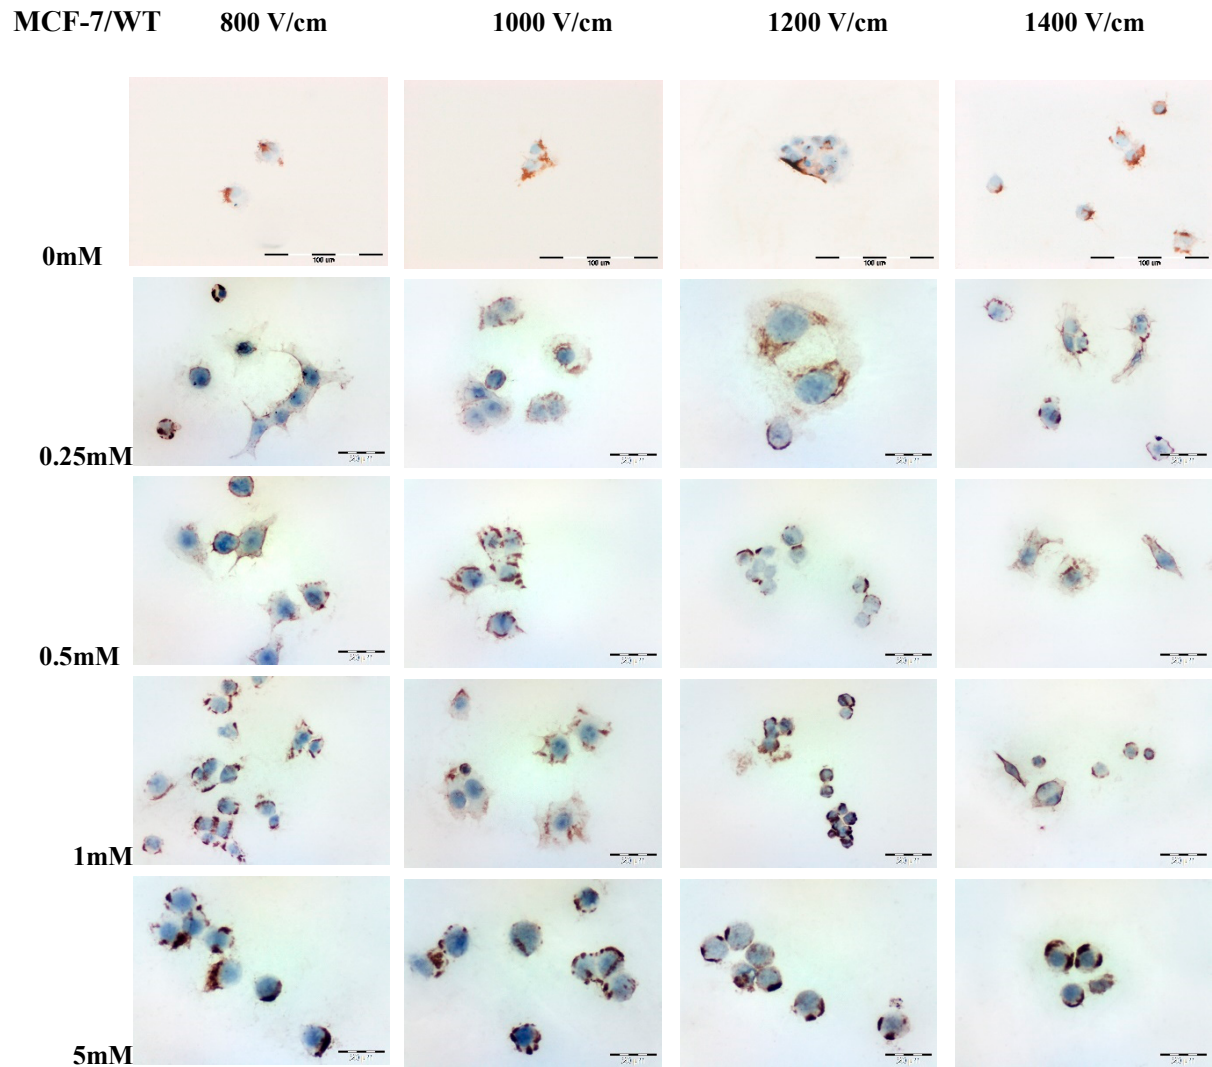

**Figure S1.** Expression of the Cav3.1 subunit after 24-hour incubation in MCF-7/WT cell line.

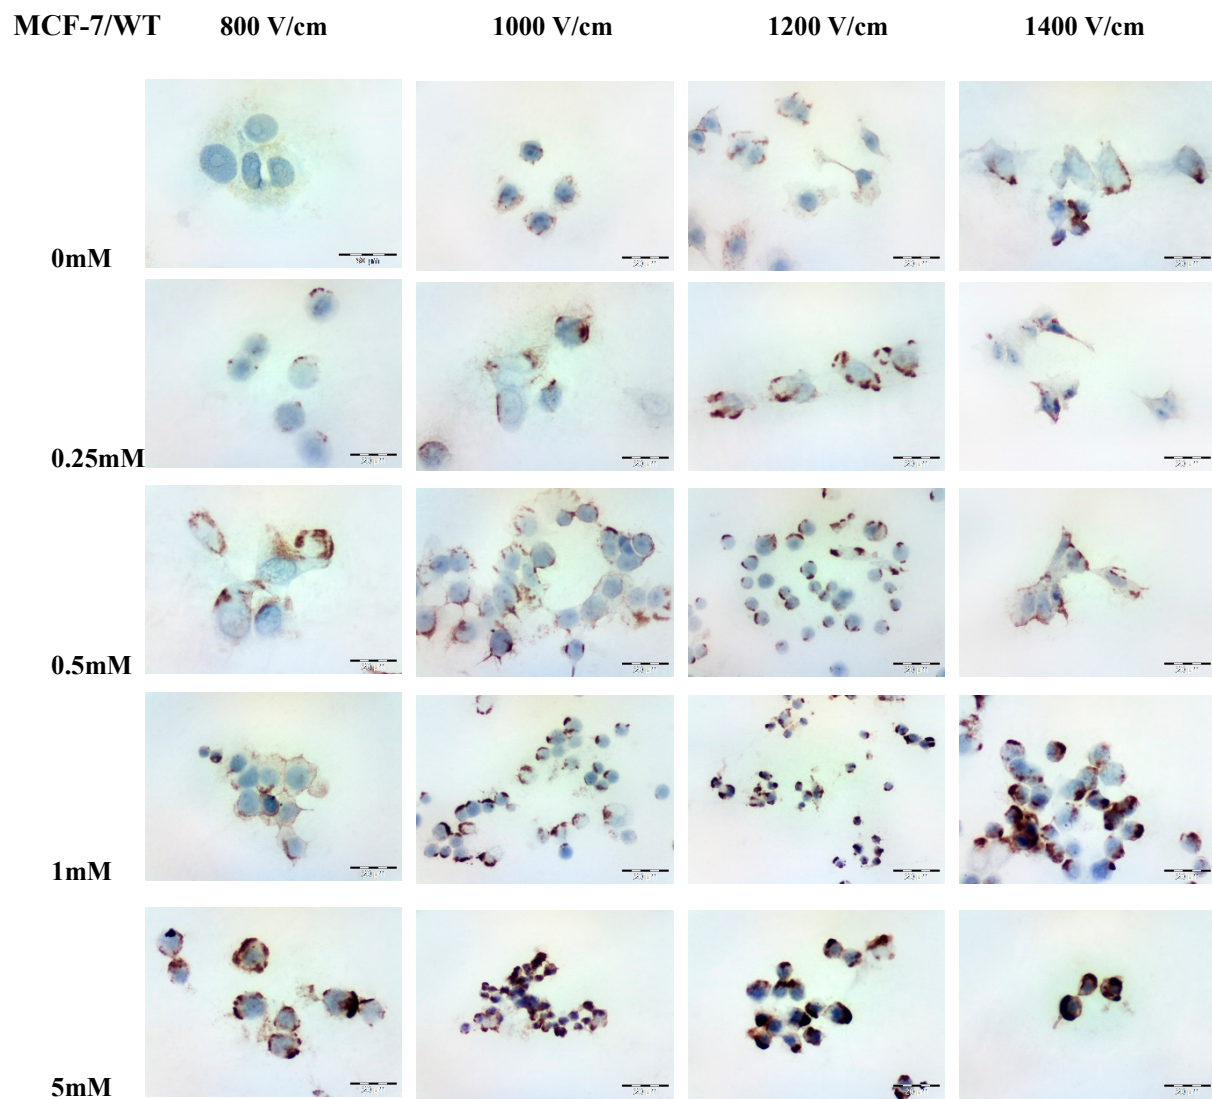

**Figure S2.** Expression of the Cav3.1 subunit after 48-hour incubation in MCF-7/WT cell line.

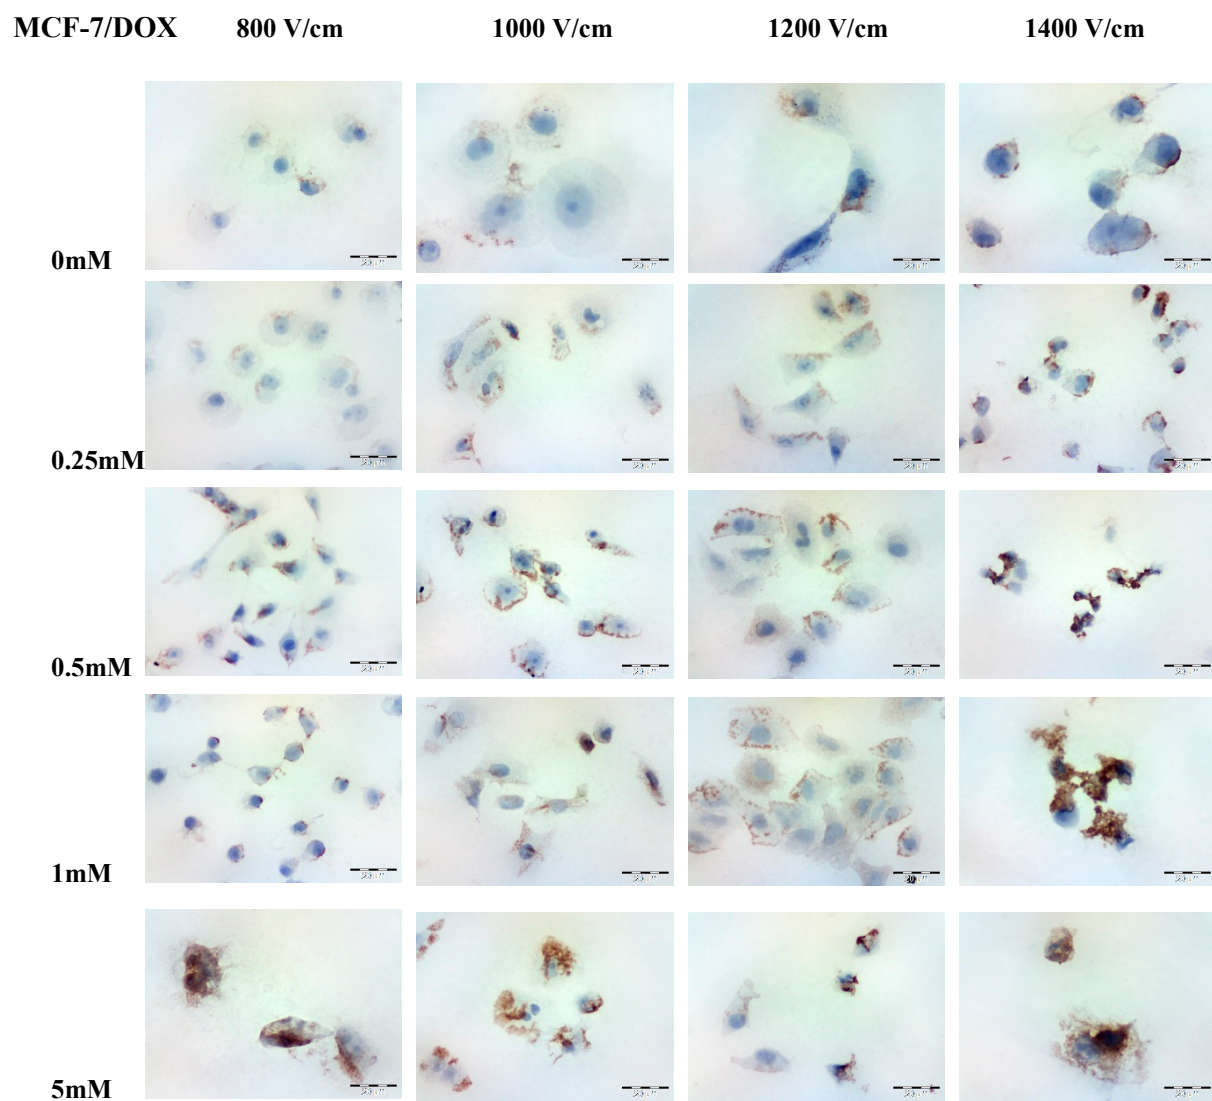

**Figure S3.** Expression of the Cav3.1 subunit after 24-hour incubation in MCF-7/DOX cell line.



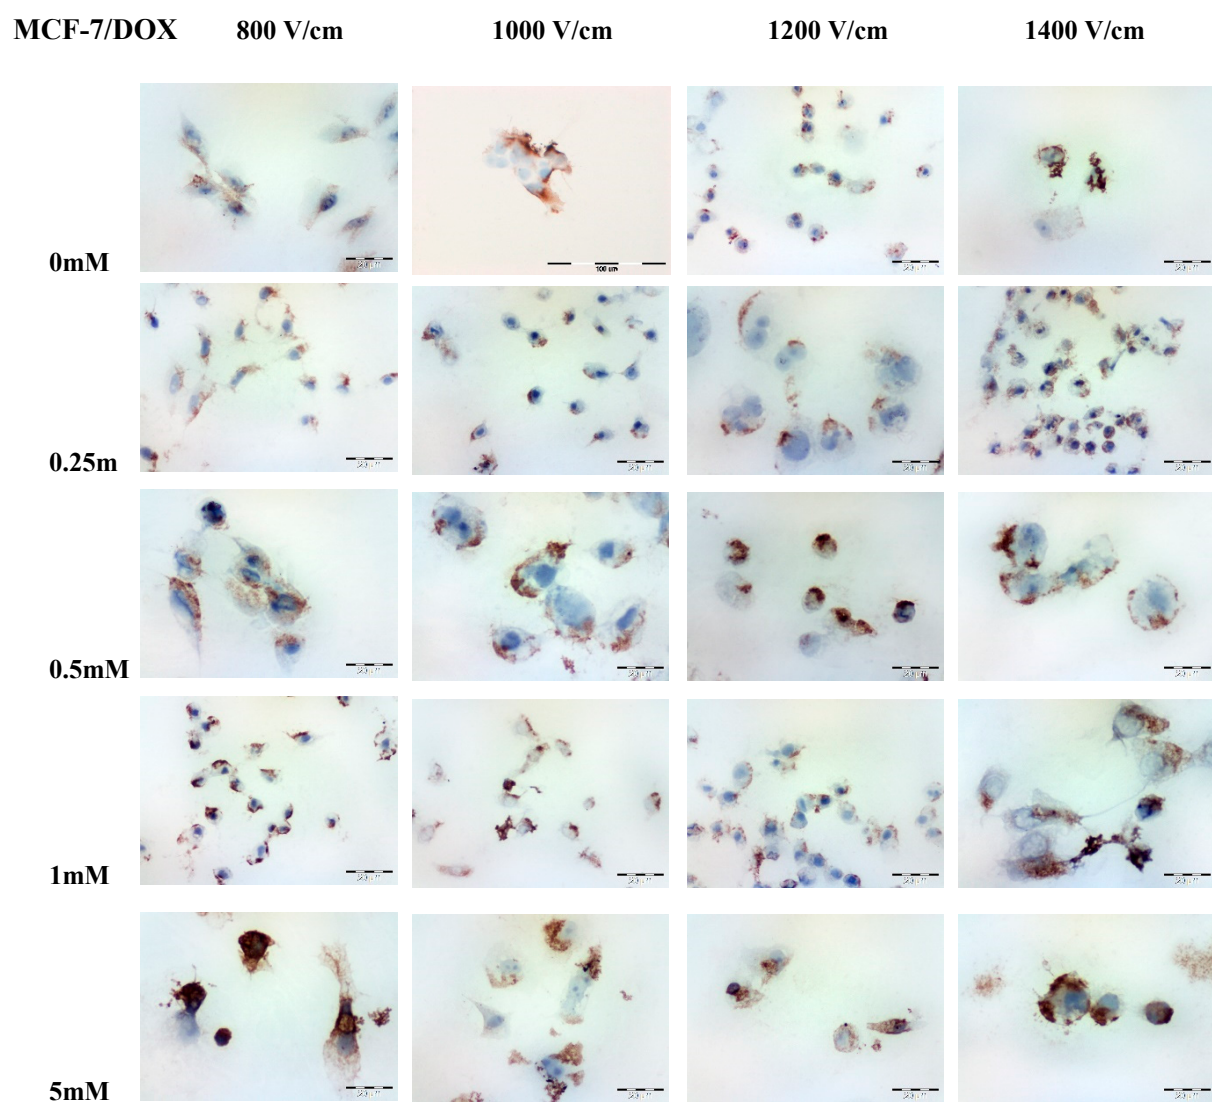

**Figure S4.** Expression of the Cav3.1 subunit after 48-hour incubation in MCF-7/DOX cell line.

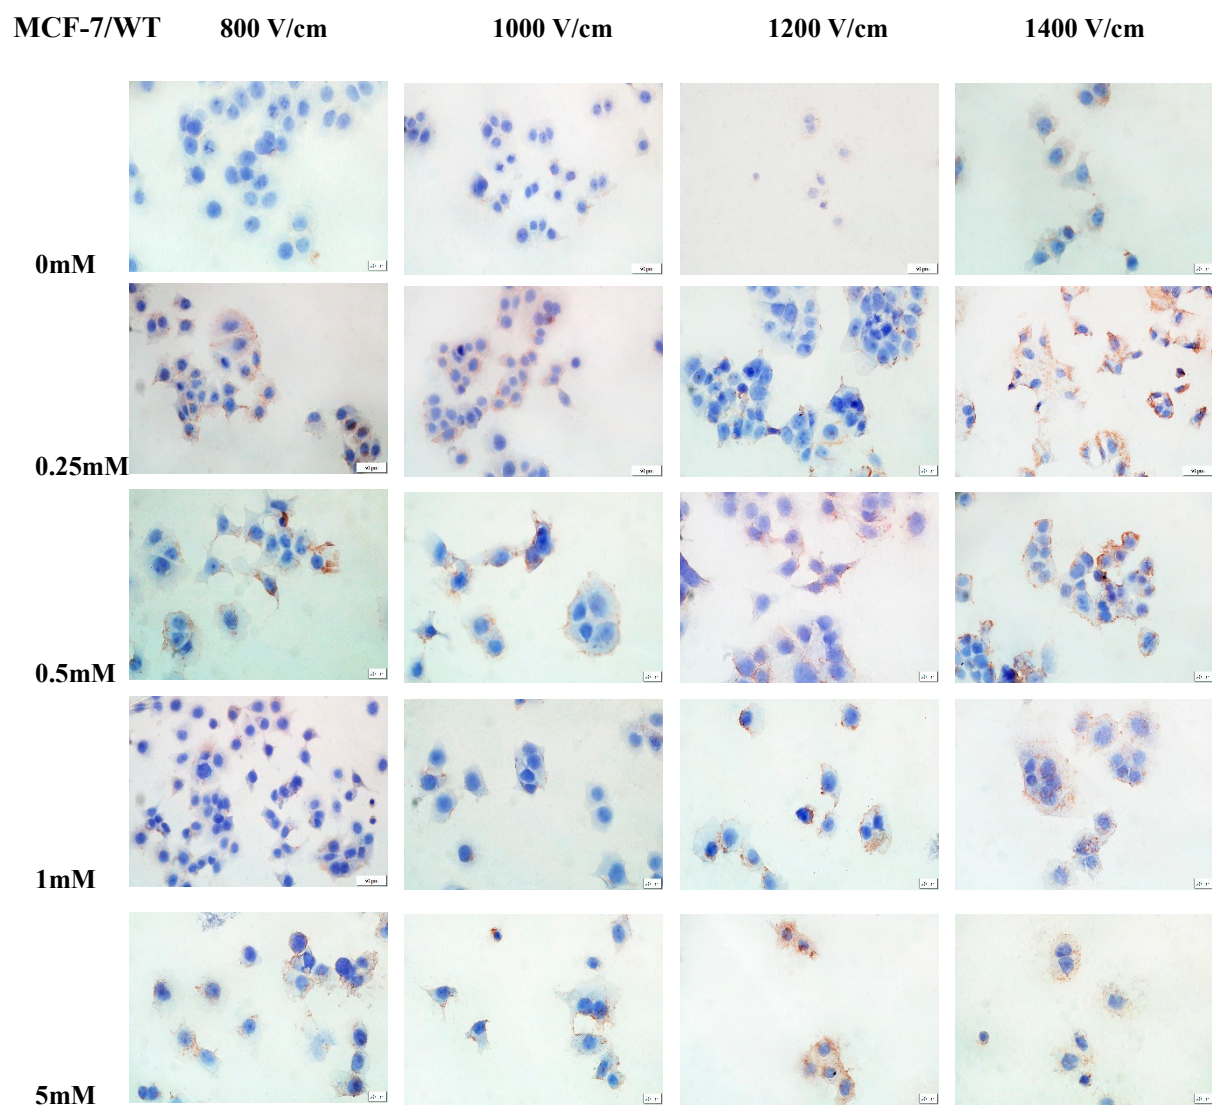

**Figure S5.** Expression of the Cav3.2 subunit after 24-hour incubation in MCF-7/WT cell line.

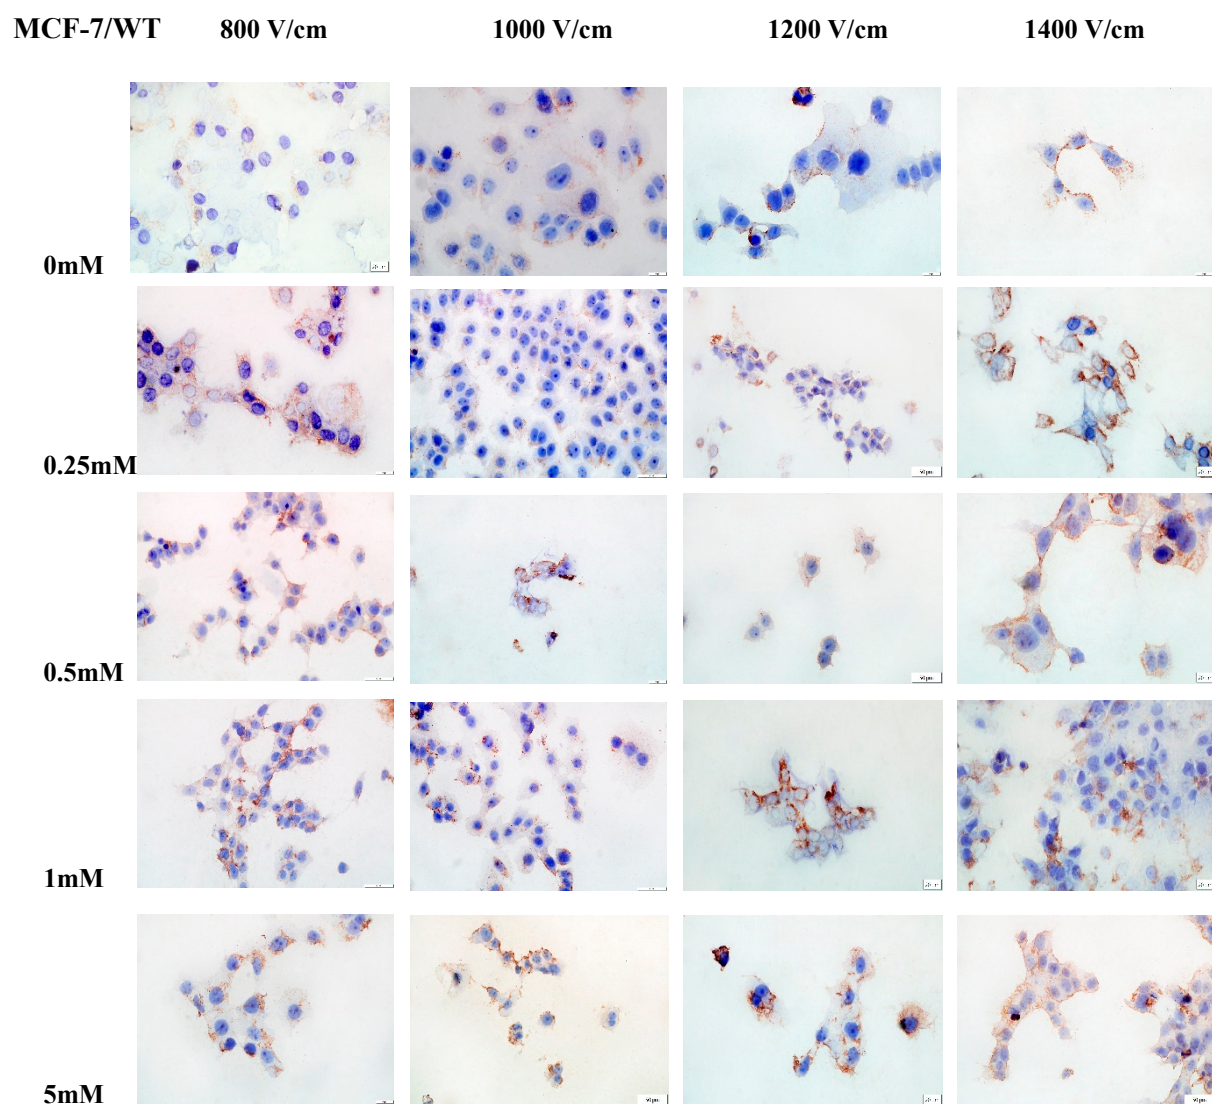

**Figure S6.** Expression of the Cav3.2 subunit after 48-hour incubation in MCF-7/WT cell line.



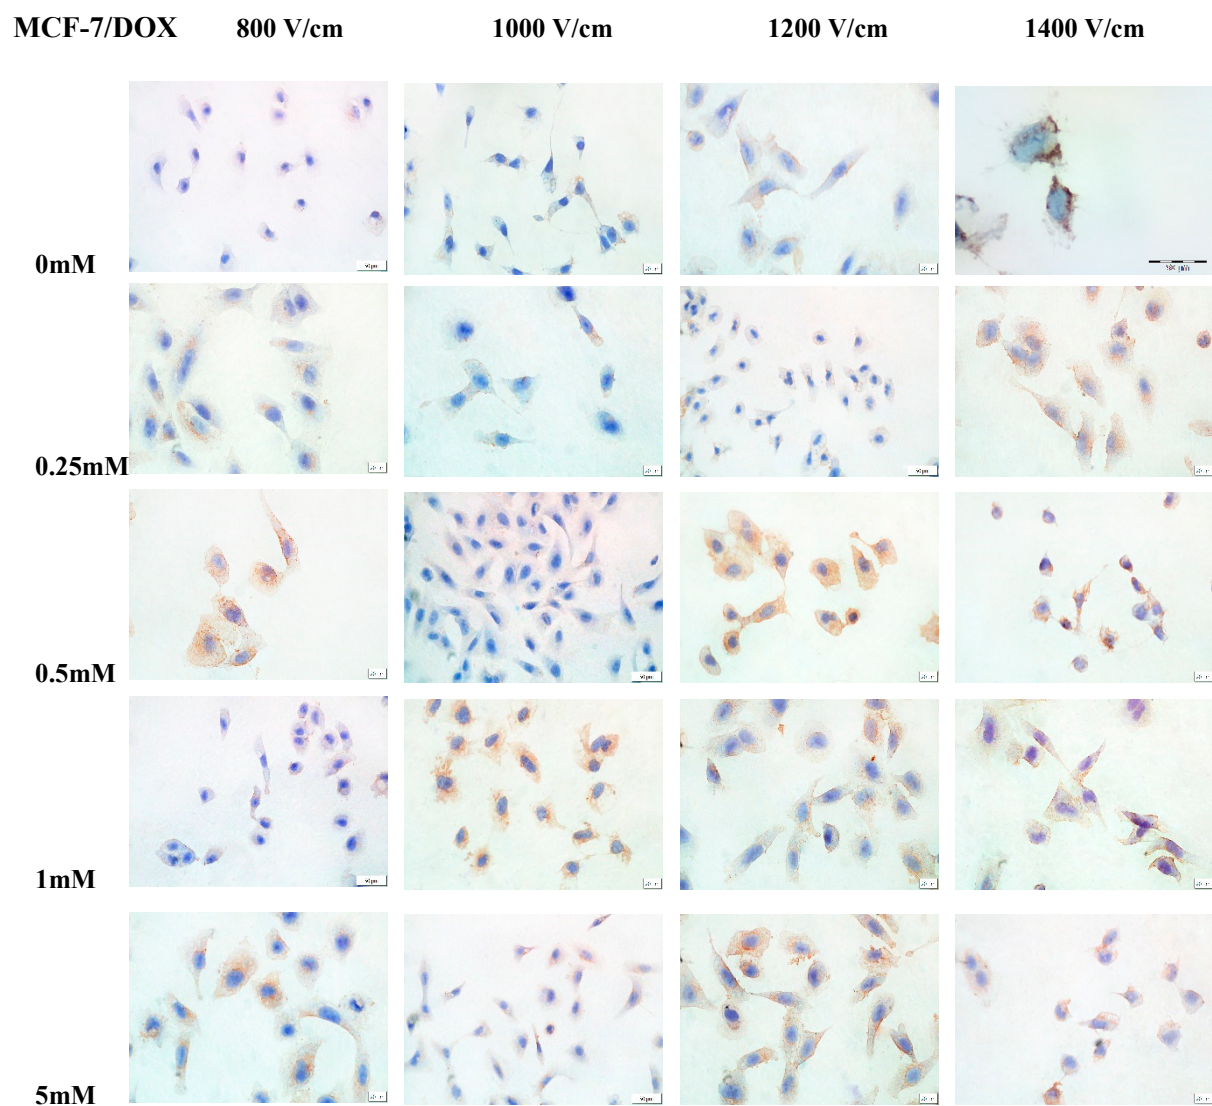

**Figure S7.** Expression of the Cav3.2 subunit after 24-hour incubation in MCF-7/DOX cell line.

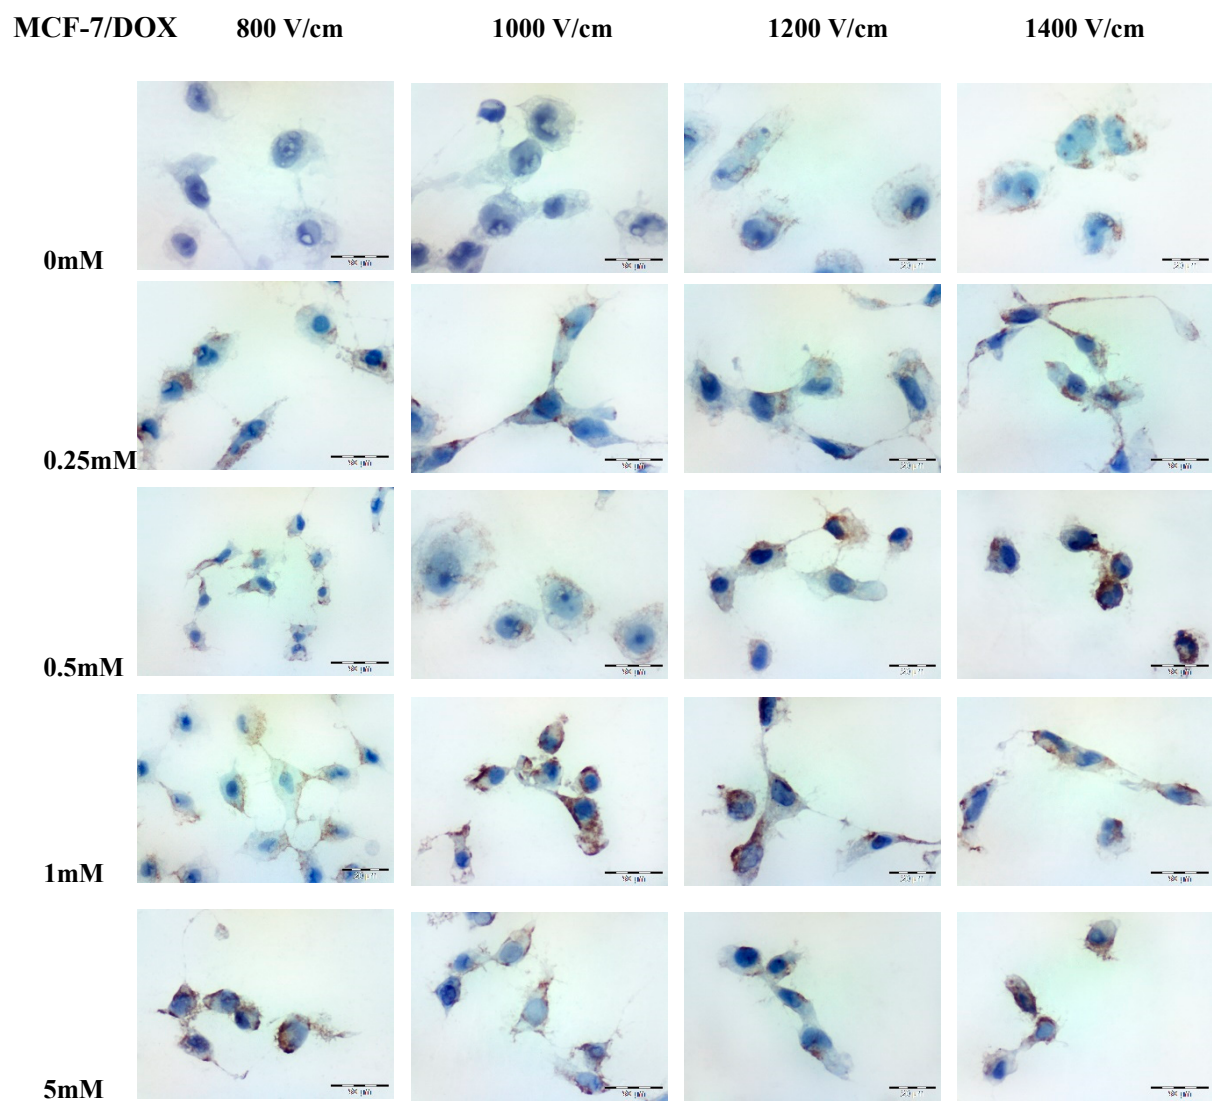

**Figure S8.** Expression of the Cav3.2 subunit after 48-hour incubation in MCF-7/DOX cell line.
